# Supplementary material for: Student Perceptions of the School eHealth Education Program Pakistan (eSHEPP): A Qualitative Study of Acceptability, Feasibility, and Awareness of Non-Communicable Diseases
Source: Research Square preprint supplement (doi:10.21203/rs.3.rs-9707948/v1), 2026-06-05

## Supplementary Material 1. Participant Demographics (N = 27)

| **Characteristic** | **n** | **%** | **Mean Age (SD)** | **Age Range** |
| --- | --- | --- | --- | --- |
| Total | 27 | 100 | 15.37 (0.90) | 14-17 |
| **Gender** | | | | |
| Female | 15 | 55.6 | 15.33 (0.82) | 14-16 |
| Male | 12 | 44.4 | 15.42 (1.00) | 14-17 |
| **Focus Group Discussion (FGD)** | | | | |
| FGD1, Female | 8 | 29.6 | 15.00 (0.93) | 14-16 |
| FGD2, Female | 7 | 25.9 | 15.57 (0.53) | 15-16 |
| FGD3, Male | 6 | 22.2 | 15.33 (1.21) | 14-17 |
| FGD4, Male | 6 | 22.2 | 15.67 (0.82) | 14-16 |

**Note:**FGDs were stratified by gender to support comfortable discussion and allow comparison across gender groups. Target recruitment was 8 participants per FGD; actual numbers reflect attendance on the day of data collection. All participants were students in grades 9–12 at the time of data collection.

**Supplementary Material 2. Distribution of student responses across subthemes and categories within overarching themes.**


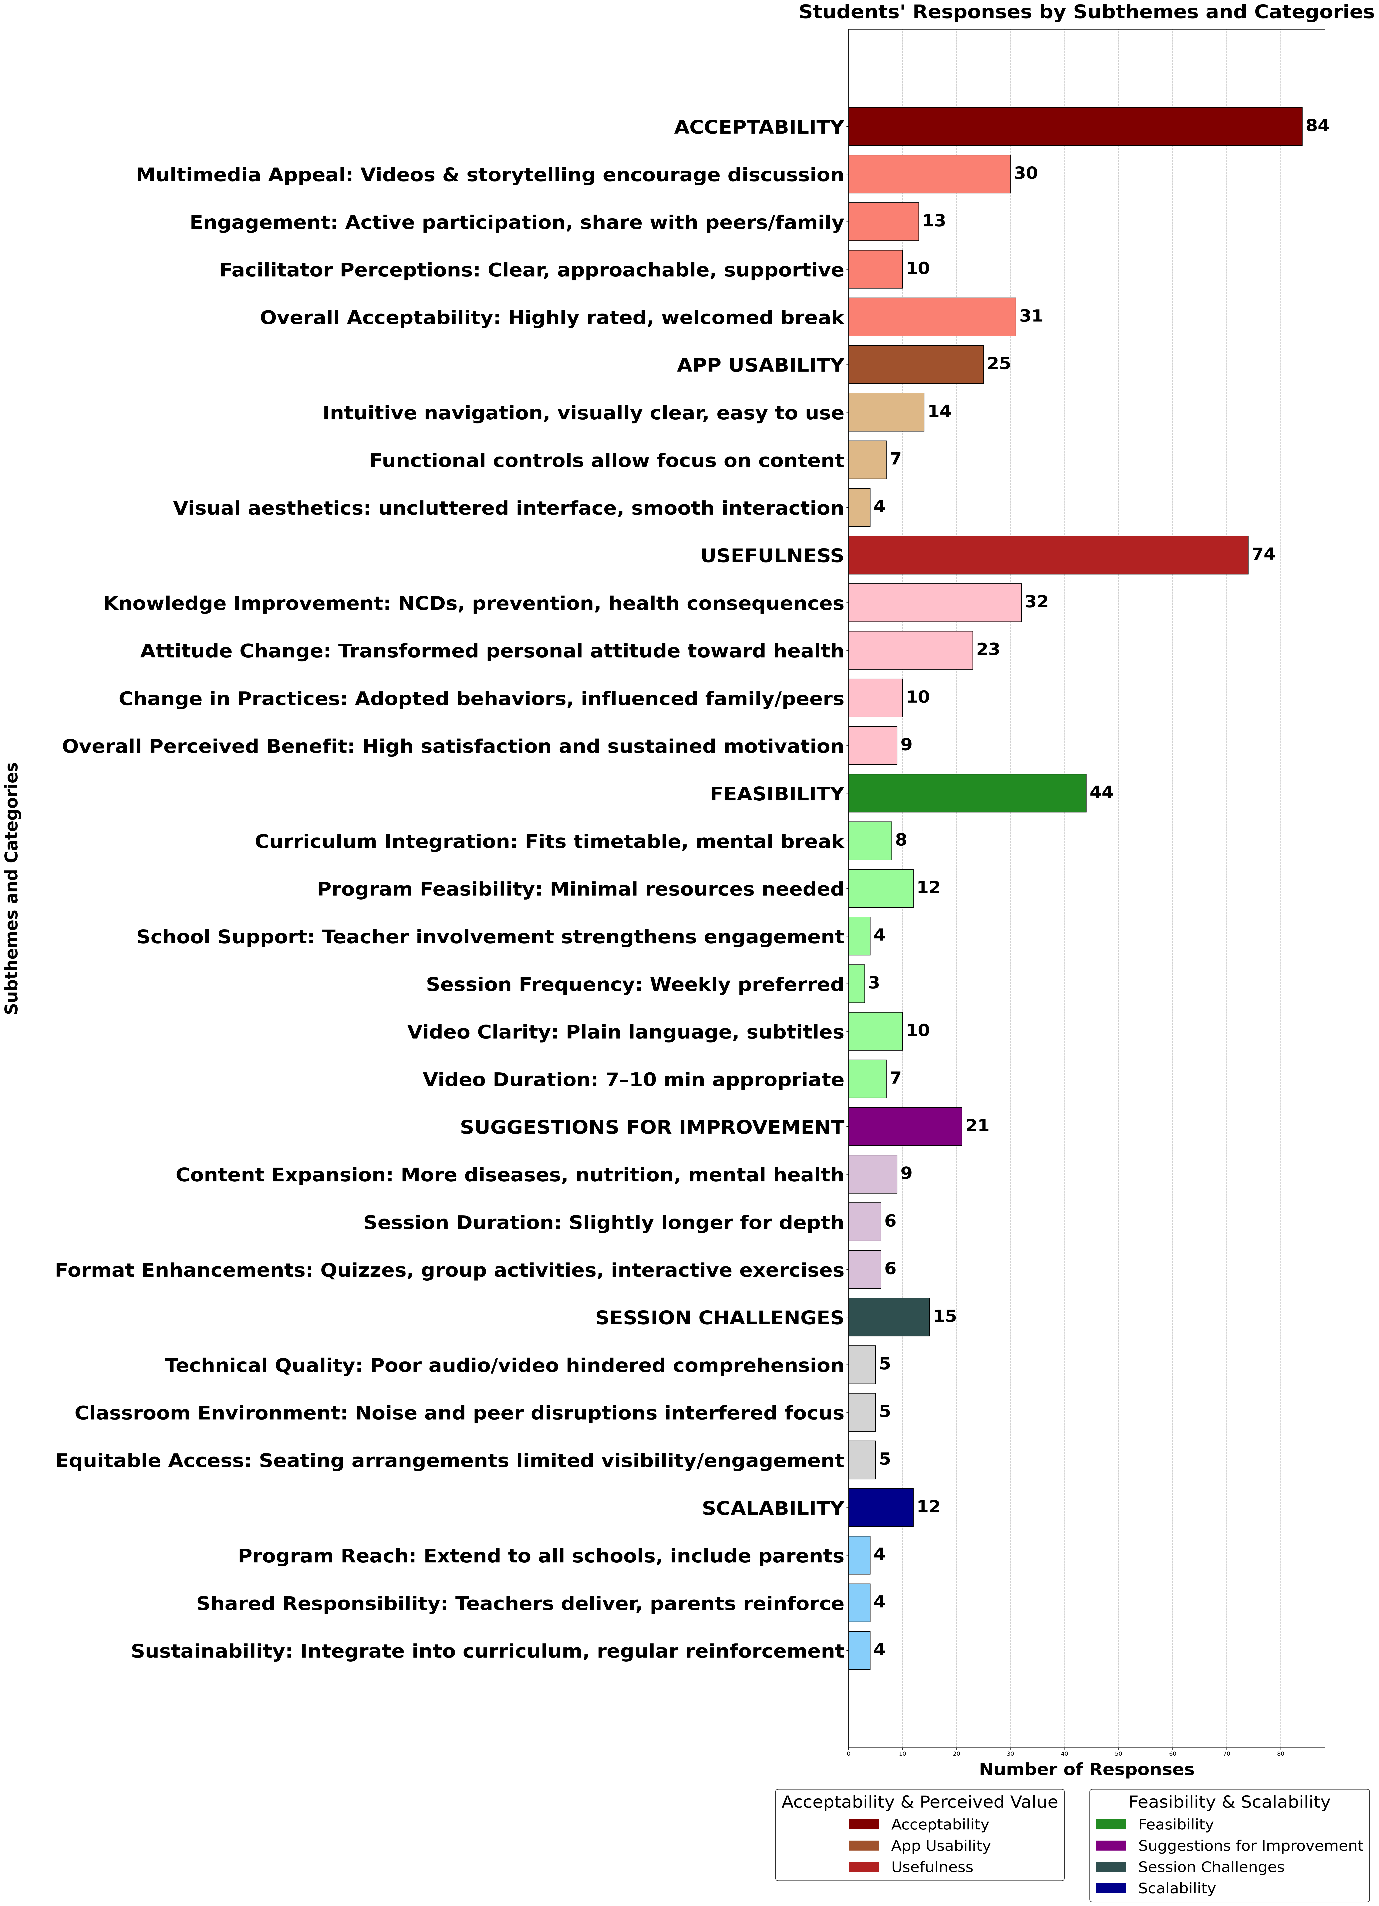


## Supplementary Material 3. Coding tree of eSHEPP illustrating overarching themes and subthemes


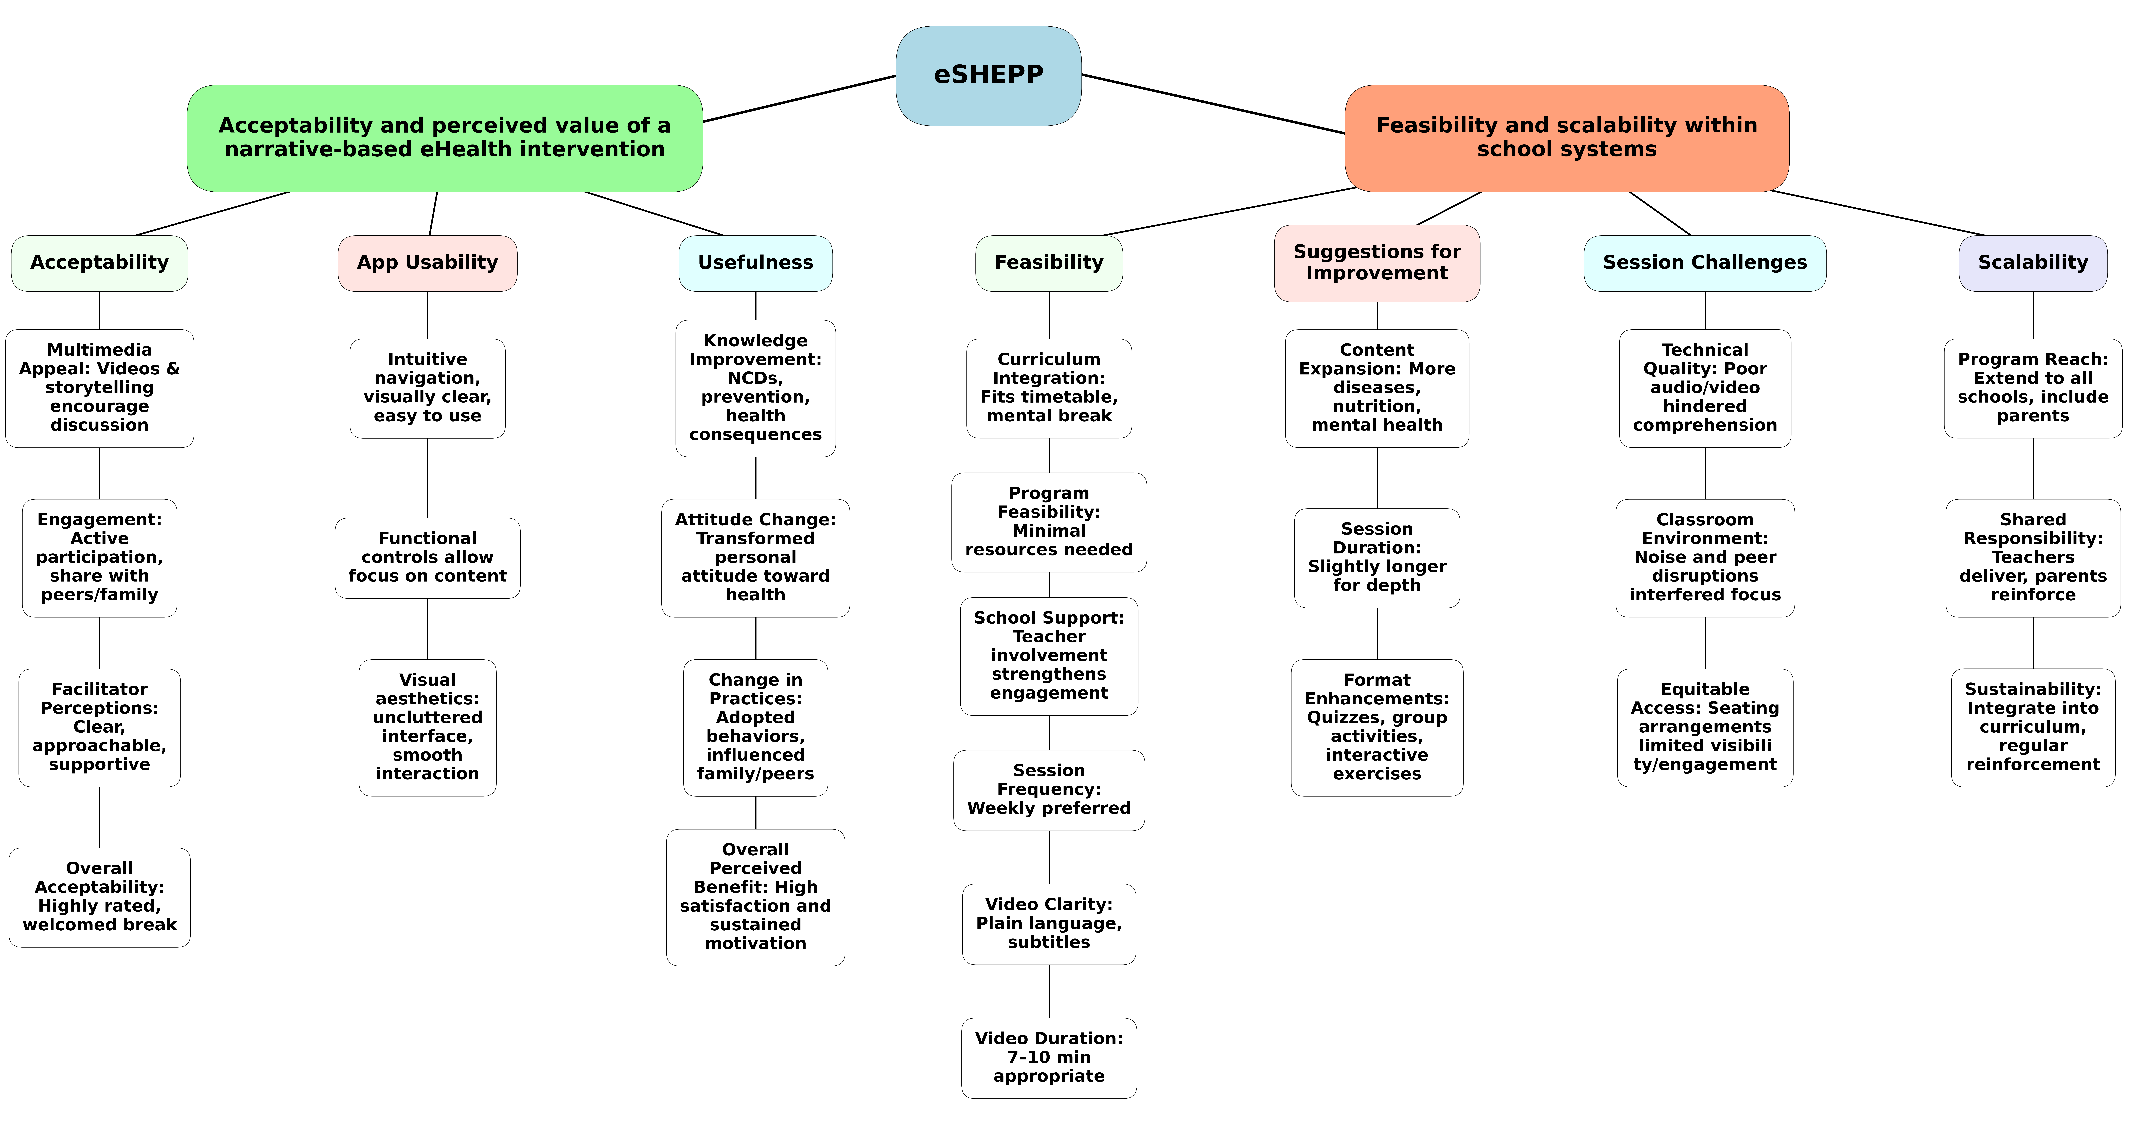

Supplement: Supplementary file 2 [file 47ebd156f529bac775a3c36b.docx]
