# Supplementary material for: Student Perceptions of the School eHealth Education Program Pakistan (eSHEPP): A Qualitative Study of Acceptability, Feasibility, and Awareness of Non-Communicable Diseases
Source: Research Square preprint supplement (doi:10.21203/rs.3.rs-9707948/v1), 2026-06-05
Supplement: Supplementary file 3 [file 79a9725178e2380505512101.docx]

**Supplementary Material 5. Codebook - School eHealth Education Program Pakistan (eSHEPP)**

| **Overarching Theme** | **Subtheme** | **Code** | **Description** | **Mapped Construct (TAM / TTF)** |
| --- | --- | --- | --- | --- |
| **Theme 1: High acceptability and perceived value of a narrative-based eHealth intervention** | **Acceptability** | Student Acceptability – Satisfaction | To capture students’ positive experiences and enjoyment of the program. | TAM: Attitude Toward Use (Positive) |
| Student Acceptability – Dissatisfaction | To capture students’ negative feedback or boredom with content. | TAM: Attitude Toward Use (Negative) |
| Acceptance of Multimedia – Liked Sessions | To capture students’ preferences for specific sessions or videos. | TAM: Perceived Usefulness |
| Acceptance of Multimedia – Disliked Sessions | To capture students’ perceptions of sessions or videos as unengaging or ineffective. | TAM: Attitude Toward Use (Negative) |
| Engagement – Active Engagement | To capture students’ active participation and attentiveness during sessions. | TAM: Actual Use (Positive) |
| Engagement – Disinterest | To capture students’ signs of inattention or lack of engagement. | TAM: Actual Use (Negative) |
| Facilitator Perception – Positive | To capture students’ views of facilitators as helpful, approachable, and supportive. | TTF: Organizational Support |
| Facilitator Perception – Negative | To capture students’ views of facilitators as ineffective or unapproachable. | TTF: Organizational Barrier |
| **App Usability** | Satisfaction with App | To capture students’ perception of ease of navigation, clarity, and enjoyable interaction with the app. | TAM: Perceived Ease of Use & Usefulness |
| Usability Issues | To capture students’ experiences of technical or navigation problems that hindered engagement. | TAM: Perceived Ease of Use (Negative) |
| Willingness to Reuse | To capture students’ intention to continue using or recommend the app for learning. | TAM: Behavioral Intention to Use |
| Visual Aesthetics – Appealing Design | To capture students’ positive perception of app visuals as attractive, clear, and engaging. | TAM: Perceived Ease of Use & Attitude Toward Use |
| Visual Aesthetics – Poor Design | To capture students’ negative perception of app visuals as confusing, unattractive, or distracting. | TAM: Perceived Ease of Use & Attitude Toward Use |
| **Usefulness** | Awareness Improvement | To capture students’ views on gains in knowledge and understanding of NCDs, risk factors, and prevention. | TAM: Perceived Usefulness |
| Attitude Change | To capture shifts in students’ mindset, values, or perceptions toward healthy behaviors. | TAM: Attitude Toward Behavior |
| Behavior Change | To capture students’ reported adoption of healthier habits and influence on peers/family. | TAM: Behavioral Intention & Actual Use |
| Lifestyle Impact – Empowerment | To capture students’ sense of confidence and motivation to take control of their own health. | TAM: Perceived Usefulness |
| Lifestyle Impact – Positive Lifestyle Actions | To capture concrete application of learned behaviors in daily life, such as diet, exercise, and mental well-being. | TAM: Behavioral Intention / Actual Use |
| **Theme 2: Feasibility and scalability within school systems** | **Feasibility** | Program Feasibility – Ease of Implementation | To capture students’ views on how easy and practical it was to participate in sessions. | TTF: Utilization |
| Implementation Challenges | To capture students’ experiences of barriers or difficulties in program delivery. | TTF: Organizational Constraint |
| Video Content Clarity – Easy to Understand | To capture students’ perceptions of videos being clear and understandable. | TAM: Perceived Ease of Use |
| Video Content Clarity – Difficult to Understand | To capture students’ perceptions of videos being confusing or complex. | TAM: Perceived Ease of Use (Negative) |
| Video Duration – Appropriate Length | To capture students’ perceptions of video duration as suitable for learning. | TTF: Task–Technology Fit (Temporal Alignment) |
| Session Frequency – Sufficient | To capture students’ views on session frequency being appropriate for learning. | TTF: Task–Technology Fit (Temporal Alignment) |
| Curriculum Integration – Well Integrated | To capture students’ perceptions of sessions fitting well within the academic schedule. | TTF: Task–Technology Fit (Task Alignment) |
| School Support – Teacher Support | To capture students’ views on how teacher involvement influenced engagement. | TTF: Facilitating Conditions (Organizational) |
| **Suggestions for Improvement** | App Features | To capture suggestions for new or enhanced app functionalities to improve usability or learning experience. | TTF: Technology Characteristics |
| Video Content | To capture suggestions for modifications to existing video content to improve engagement and understanding. | TAM: Perceived Usefulness |
| Visual Aesthetics | To capture feedback on app or video interface design, clarity, and overall visual appeal. | TAM: Perceived Ease of Use |
| **Session Challenges** | Technical Quality | To capture students’ experiences with audio or video quality: whether clear and effective or poor and disruptive. | TTF: Technology Characteristics |
| Classroom Environment | To capture students’ views on classroom conditions—such as noise, seating, and visibility—that either supported or hindered focus. | TTF: Facilitating Conditions |
| **Scalability** | Program Reach & Sustainability | To capture students’ perspectives on broadening reach and maintaining long-term delivery for program effectiveness. | TTF: Implementation Fit / Facilitating Conditions |

Abbreviations: TAM = Technology Acceptance Model TTF = Task–Technology Fit
