# Supplementary material for: Student Perceptions of the School eHealth Education Program Pakistan (eSHEPP): A Qualitative Study of Acceptability, Feasibility, and Awareness of Non-Communicable Diseases
Source: Research Square preprint supplement (doi:10.21203/rs.3.rs-9707948/v1), 2026-06-05
Supplement: Supplementary file 4 [file 86fa3e8e61d39b32b28afd6d.docx]

**Supplementary Material 6 - Focus Group Discussion (FGD) guide**

This file contains the full guide used for focus group discussions with students. The guides include main questions, probes, and instructions for moderators/interviewers.

**Focus Group Discussion Guide**

**Title:** Acceptability, Feasibility, and Perceived Usefulness of the School eHealth Education Program Pakistan (eSHEPP) for Improving Adolescents’ Awareness of Noncommunicable Diseases in Secondary and Higher Secondary Schools

**Guidelines for Focus Group Discussions (FGDs) with Students**

- **Consent:** Written informed consent will be obtained from parents/guardians, and written assents will be obtained from each participant before commencing the FGD.
- **Duration:** Approximately 45 minutes will be allocated or extended until data saturation is reached.
- **Mode of Recording:** A digital voice recorder will be used to record the session. Written notes will also be taken.
- **Place of FGD:** A secure and comfortable space within the school premises, such as a library or study room, where participants feel at ease and privacy is ensured.
- **Transcription:** Following each discussion, recordings will be transcribed verbatim, noting pauses, changes in tone, laughter, and moderator comments. The total duration of the FGD and transcription time will also be recorded to inform subsequent sessions.
- **Research Team:** FGDs will be conducted by a two-member team, one moderator and one note-taker responsible for written and audio documentation.

**General Instructions**

**Welcome the participants.**

**Provide an overview of the topic:**
The focus of the School eHealth Education Program Pakistan (eSHEPP) is to enhance students' awareness of noncommunicable disease (NCD) prevention, with emphasis on topics such as diet, physical activity, mental well-being, and other related factors. The program utilizes a digital application integrated into multimedia classroom sessions. Trained facilitators, supported by school representatives, lead these sessions to guide discussions and promote engagement.

**Purpose of the FGD:**
To explore participants’ perceptions regarding the usefulness, acceptability, and task–technology fit of the School eHealth Education Program Pakistan (eSHEPP) in improving adolescents’ awareness regarding NCDs prevention.

**Ground Rules for the FGD**

- Speak one at a time and in an audible voice.
- Respect each other’s opinions.
- Avoid side conversations.
- Everyone is encouraged to contribute, but you are not required to answer every question.
- Respond only to questions you relate to and feel comfortable answering.
- You may respond directly to other participants’ comments; there is no need to address the facilitator.
- Be honest; share what is true for you.
- Ask questions or request clarification at any time.

**Session Details**

| **FGD Session No.** |  |
| --- | --- |
| **Date: ____________** | **Duration: ____________** |
| **Place: ____________** | **Start Time: : ____________** |
| **End Time: : ____________** | **Moderator: ____________** |
| **Note-taker: ____________** |  |

**Session Attendance Sheet**

| **S. No.** | **Name of Student** | **Age (years)** | **Grade/Standard** | **Contact Details** | **Written Consent** | **Verbal Consent** |
| --- | --- | --- | --- | --- | --- | --- |
| **1** |  |  |  |  |  |  |
| **2** |  |  |  |  |  |  |
| **3** |  |  |  |  |  |  |
| **4** |  |  |  |  |  |  |
| **5** |  |  |  |  |  |  |
| **6** |  |  |  |  |  |  |

| **S. No.** | **Lead** | **Comments** |
| --- | --- | --- |
| 1. **Acceptability** | | |
|  | Acceptability of School eHealth Education Program Pakistan (eSHEPP) by Students  Probe: Students' level of acceptability towards the eHealth NCD prevention program. Factors contributing to satisfaction or dissatisfaction with the program. |  |
|  | Acceptance of Health Promoting Videos through multimedia in the classroom  Probe: Students' satisfaction or dissatisfaction with the health promoting videos delivered via the eHealth app in their classroom. Which sessions were most and least liked by the participants? |  |
|  | Student Engagement during Health-Promoting Sessions  Probe: Students' level of engagement during the health-promoting sessions. Whether they actively participate and contribute to discussions or display signs of disinterest or lack of engagement. |  |
|  | Students' Perception of Facilitator's Role in Sessions  Probe: How students perceive the facilitator's role during the sessions. Whether the facilitation was helpful, annoying, uncomfortable, or any other specific feedback regarding the facilitator's involvement. |  |
| 1. **Feasibility** | | |
|  | Feasibility of School eHealth Education Program Pakistan (eSHEPP)  Probe: Overall feasibility of implementing a school-based eHealth program for NCD prevention. Challenges and advantages related to program delivery, understanding, and effectiveness. |  |
|  | Opinion on Content of Health Promoting Videos  Probe: Perception of the health promoting videos' content - whether it is easy or difficult to understand. Whether the concepts and messages conveyed in the videos are well defined or poorly defined. Assessment of whether the videos are engaging or boring, and whether they are interesting or not interesting |  |
|  | Opinion on Duration of Health Promoting Videos  Probe: Views on the time duration of the health promoting video content. Is the duration considered too long or too short? |  |
|  | Opinion on the Frequency of Health-Promoting Sessions  Probe: Ease or difficulty in attending the sessions consistently. Whether the current frequency of sessions per month is sufficient, or if there should be more sessions to meet participants' needs and preferences. |  |
|  | Integration of eSHEPP into School Curriculum and Timetable  Probe: Challenges faced in aligning the program with other academic priorities and activities within the existing school curriculum and timetable. How the integration process was managed and any potential obstacles encountered. |  |
|  | Support from School Administrators, Teachers, and Staff  Probe: The level of support received from school administrators, teachers, and staff members in facilitating the implementation of the program. The role they play in ensuring the program's success and effectiveness. |  |
| **C. Usefulness** | | |
|  | Usefulness of eSHEPP  Probe: The extent to which the eSHEPP was perceived as useful in enhancing NCD prevention awareness among students. Feedback on the program's impact on knowledge, attitudes, and practices related to NCD prevention. |  |
|  | Impact of eSHEPP on Students' Lifestyle  Probe: How did the program empower and motivate students to make positive changes in their lifestyle? |  |
|  | eHealth App Usage and Satisfaction  Probe: Your experience using the eHealth app. Whether you would consider using the app again and your overall satisfaction with its usability and functionality. |  |
|  | Challenges faced by students while attending the health promoting sessions via multimedia in their classrooms. Probe:   - Participant engagement - Session content for participant - Time management |  |
|  | Visual Aesthetics and Presentation of Health-Promoting Videos:  Probe: Views on the visual appeal and engagement level of health-promoting videos. Feedback on the overall presentation and any suggestions for improvement to enhance the videos' effectiveness. |  |
|  | Suggestions for improvement of eHealth app.  Probe:   - App segments - Videos Content - App features |  |

We have reached the end of our discussion. Do you have any additional suggestions regarding the School eHealth Education Program Pakistan (eSHEPP)?

Thank you for your participation.
